# Supplementary material for: BMI-based obesity classification misses children and adolescents with raised cardiometabolic risk due to increased adiposity
Source: Springer Nature journal article supplement (doi:10.1186/s12933-023-01972-8), 2023-09-04
Supplement: MOESM1 [file 12933_2023_1972_MOESM1_ESM.pdf]

## BMI-based classification (Cole)

Normal weight

Overweight

Obesity

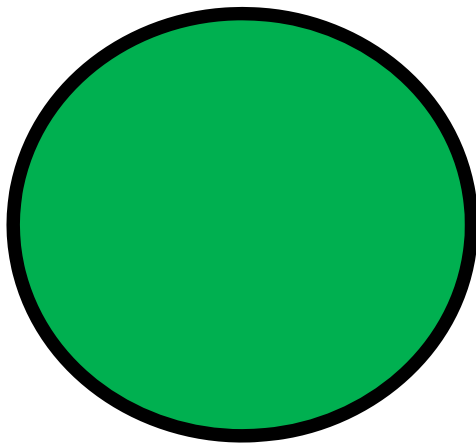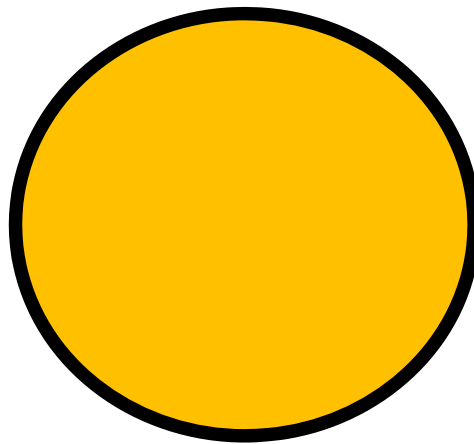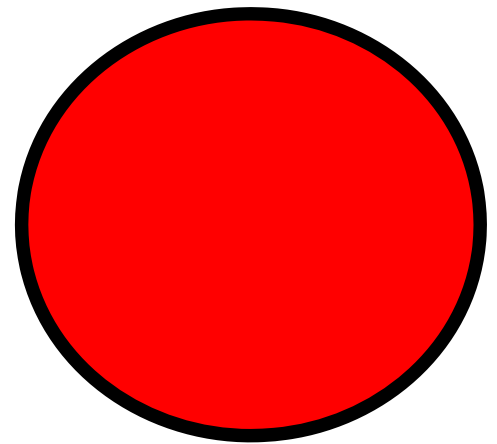

## % Body fat-based classification

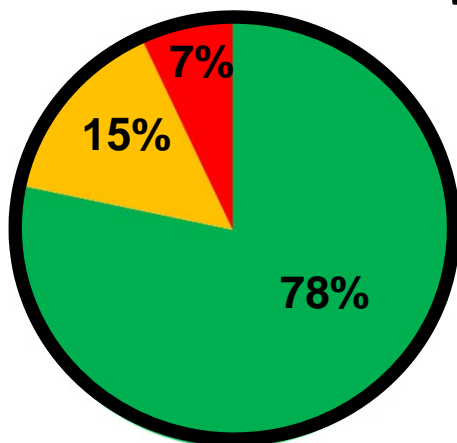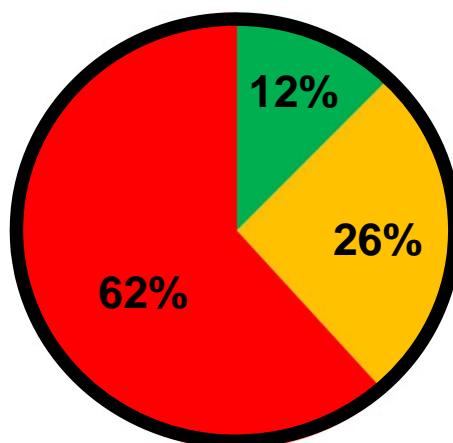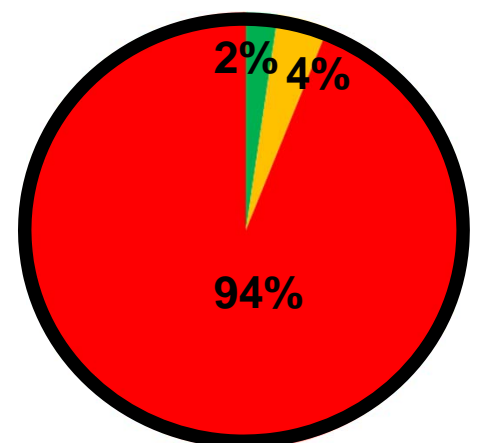

**Supplementary Fig. 1** Percentages of misclassification according to body mass index (upper panel) and body fat percentage (lower panel) in children and adolescents of the global cohort (n=553) classified according to Cole.

**Supplementary Table 1 Distribution of children and adolescents from subcohort 2 according to the established groups and Tanner stage**

|         | Normal<br>(Cole and BF%) | Normal-OW<br>Cole/Obesity<br>BF%<br>NOOB | Obesity-<br>Cole/Obesity<br>BF%<br>OBOB |
|---------|--------------------------|------------------------------------------|-----------------------------------------|
| Stage 1 | 15                       | 35                                       | 50                                      |
| Stage 2 | 14                       | 44                                       | 42                                      |
| Stage 3 | 24                       | 29                                       | 47                                      |
| Stage 4 | 50                       | 17                                       | 33                                      |
| Stage 5 | 28                       | 31                                       | 41                                      |

Data are expressed as percentage. Differences in distribution were analyzed by Chi squared ( $P=0.564$ ).
